# Supplementary material for: Collective Dynamics Differentiates Functional Divergence in Protein Evolution
Source: PLOS journal article supplement (doi:10.1371/journal.pcbi.1002428), 2012-03-29
Supplement: S2 (10.1371/journal.pcbi.1002428.s002) [file journal.pcbi.1002428.s002]

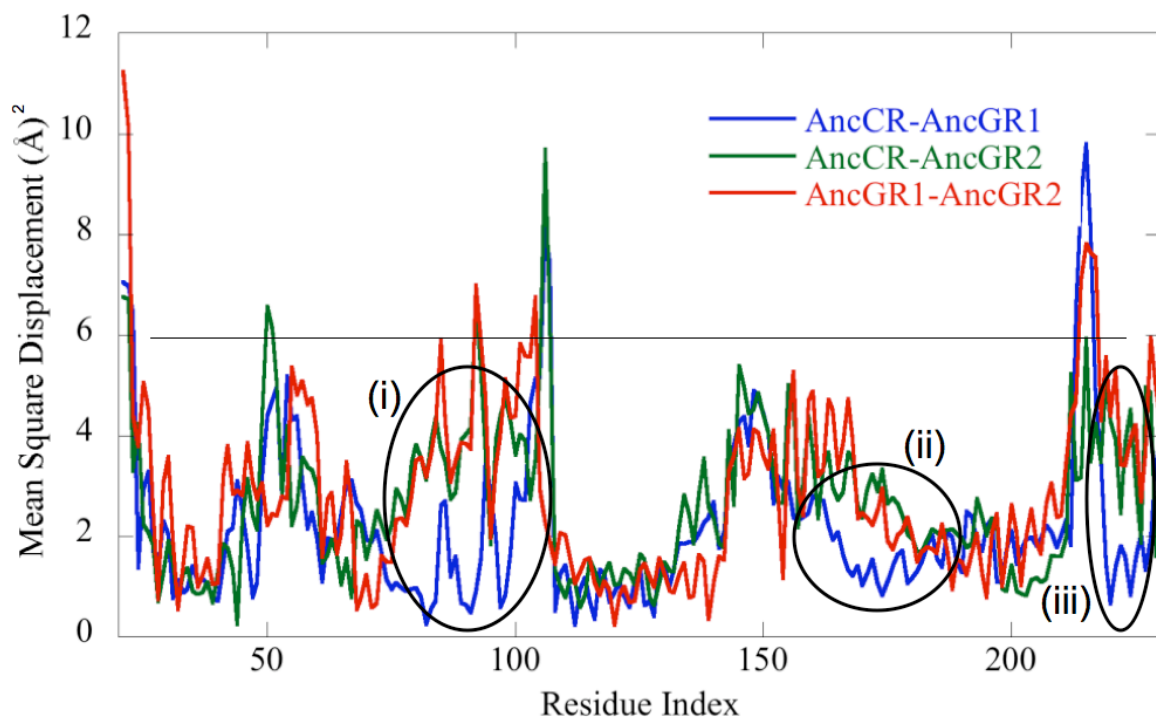

**Fig. S2:** The Mean Square Displacement between our predicted structures for AncCR-AncGR1 (blue), AncCR-AncGR2 (green), and AncGR1-AncGR2 (red). The three large structural changes between successive generations are associated with the shift in; (i)  $\beta$ -sheet b1 and helices 5, 6 and 7; (ii) helix 9 and the top of helix 10; (iii) the bottom loop of helix 10 and the activation function helix.
