# Supplementary material for: Collective Dynamics Differentiates Functional Divergence in Protein Evolution
Source: PLOS journal article supplement (doi:10.1371/journal.pcbi.1002428), 2012-03-29
Supplement: S4 (10.1371/journal.pcbi.1002428.s004) [file journal.pcbi.1002428.s004]

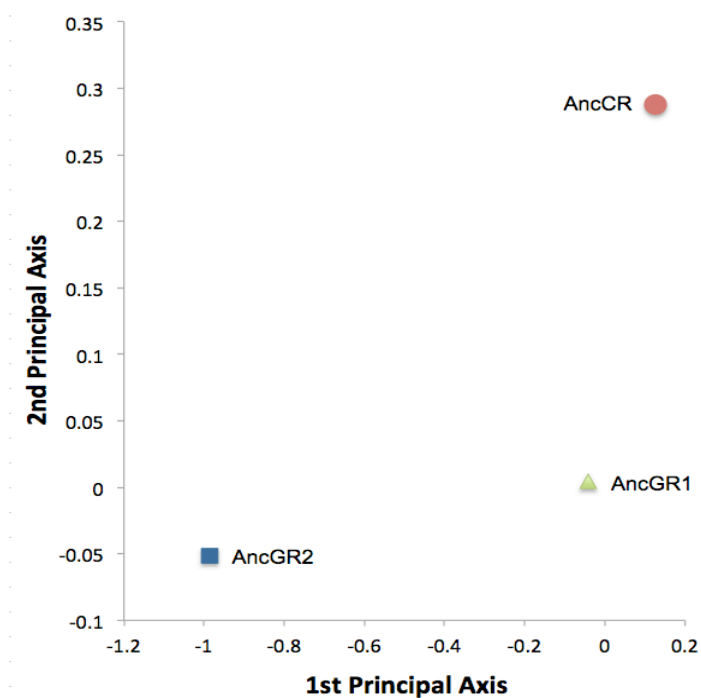

**Fig. S4:** The dynamics of the experimental AncCR, AncGR1, and AncGR2 structures plotted in a reduced subspace. While there is a clear differentiation between AncGR2 and AncCR/AncGR1 along the first principal axis, this does not hold for the second principal axis. Therefore we conclude that the ZAMF procedure allows for a more efficient sampling of dynamic space due to the larger number of initial conformations used.
