# Supplementary material for: Collective Dynamics Differentiates Functional Divergence in Protein Evolution
Source: PLOS journal article supplement (doi:10.1371/journal.pcbi.1002428), 2012-03-29
Supplement: S5 (10.1371/journal.pcbi.1002428.s005) [file journal.pcbi.1002428.s005]

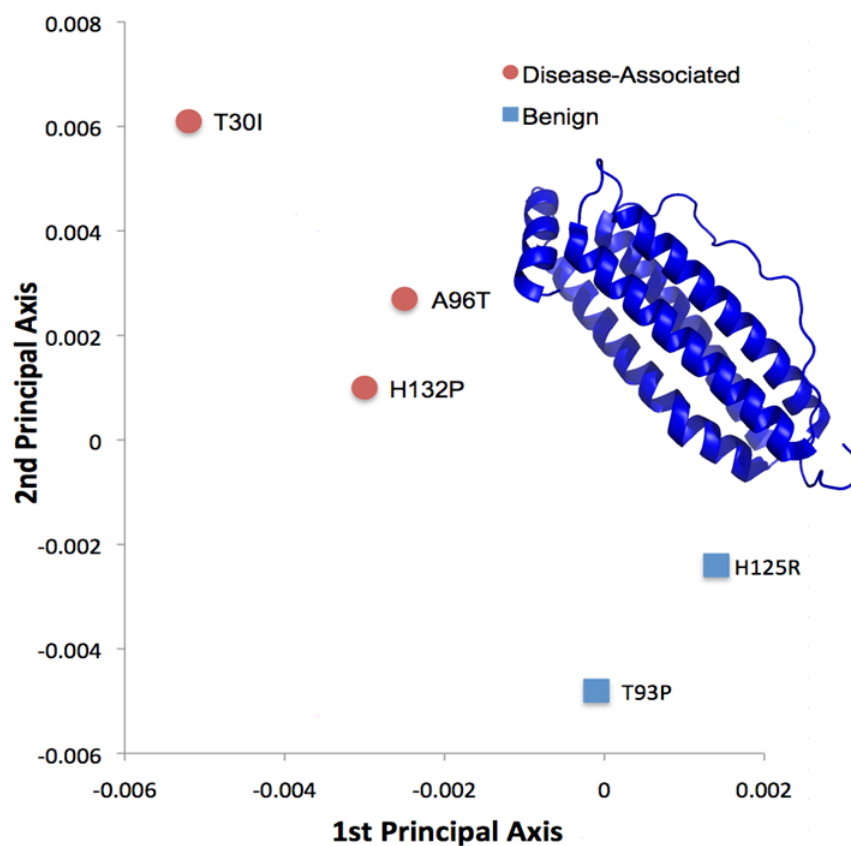

**Fig. S5:** Plot and ribbon diagram of the dynamics of the single mutation variant of human ferritin protein characterized by the slowest collective mode. The first two principal components of benign and damaging mutations (i.e. leading to functional loss) plotted against each other and they are separated based on dynamics space. The principal components were found via a Singular Value Decomposition of the **G** matrix.
