# Supplementary material for: Collective Dynamics Differentiates Functional Divergence in Protein Evolution
Source: PLOS journal article supplement (doi:10.1371/journal.pcbi.1002428), 2012-03-29
Supplement: S6 (10.1371/journal.pcbi.1002428.s006) [file journal.pcbi.1002428.s006]

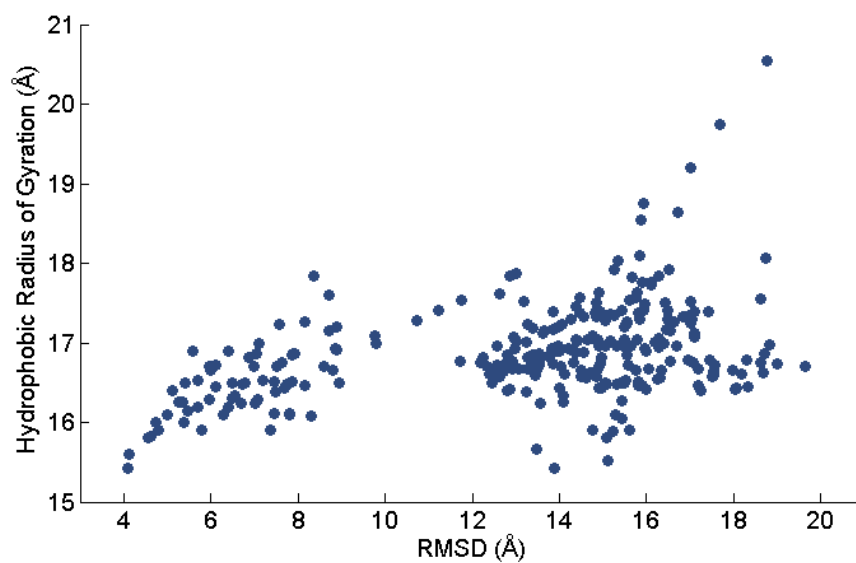

**Fig. S6:** Radius of gyration of the hydrophobic residues versus the rmsd from the experimentally determined structure of AncCR for a single FRODA run. By using the hydrophobic radius of gyration we select against non-native like structures and only seed the ensuing REMD simulations with collapsed structures, many of which are native-like.
